# Supplementary material for: Genome-wide association and multi-omic analyses reveal ACTN2 as a gene linked to heart failure
Source: PubMed Central journal article supplement (PMC7048760; doi:10.1038/s41467-020-14843-7), 2020-02-28
Supplement: 41467_2020_14843_MOESM1_ESM.pdf [file 41467_2020_14843_MOESM1_ESM.pdf]

**Genome-wide association and multi-omic analyses reveal *ACTN2* as a gene  
linked to Heart Failure**

**Arvanitis et al.**

**Supplementary Information**

# Supplementary Figure 1

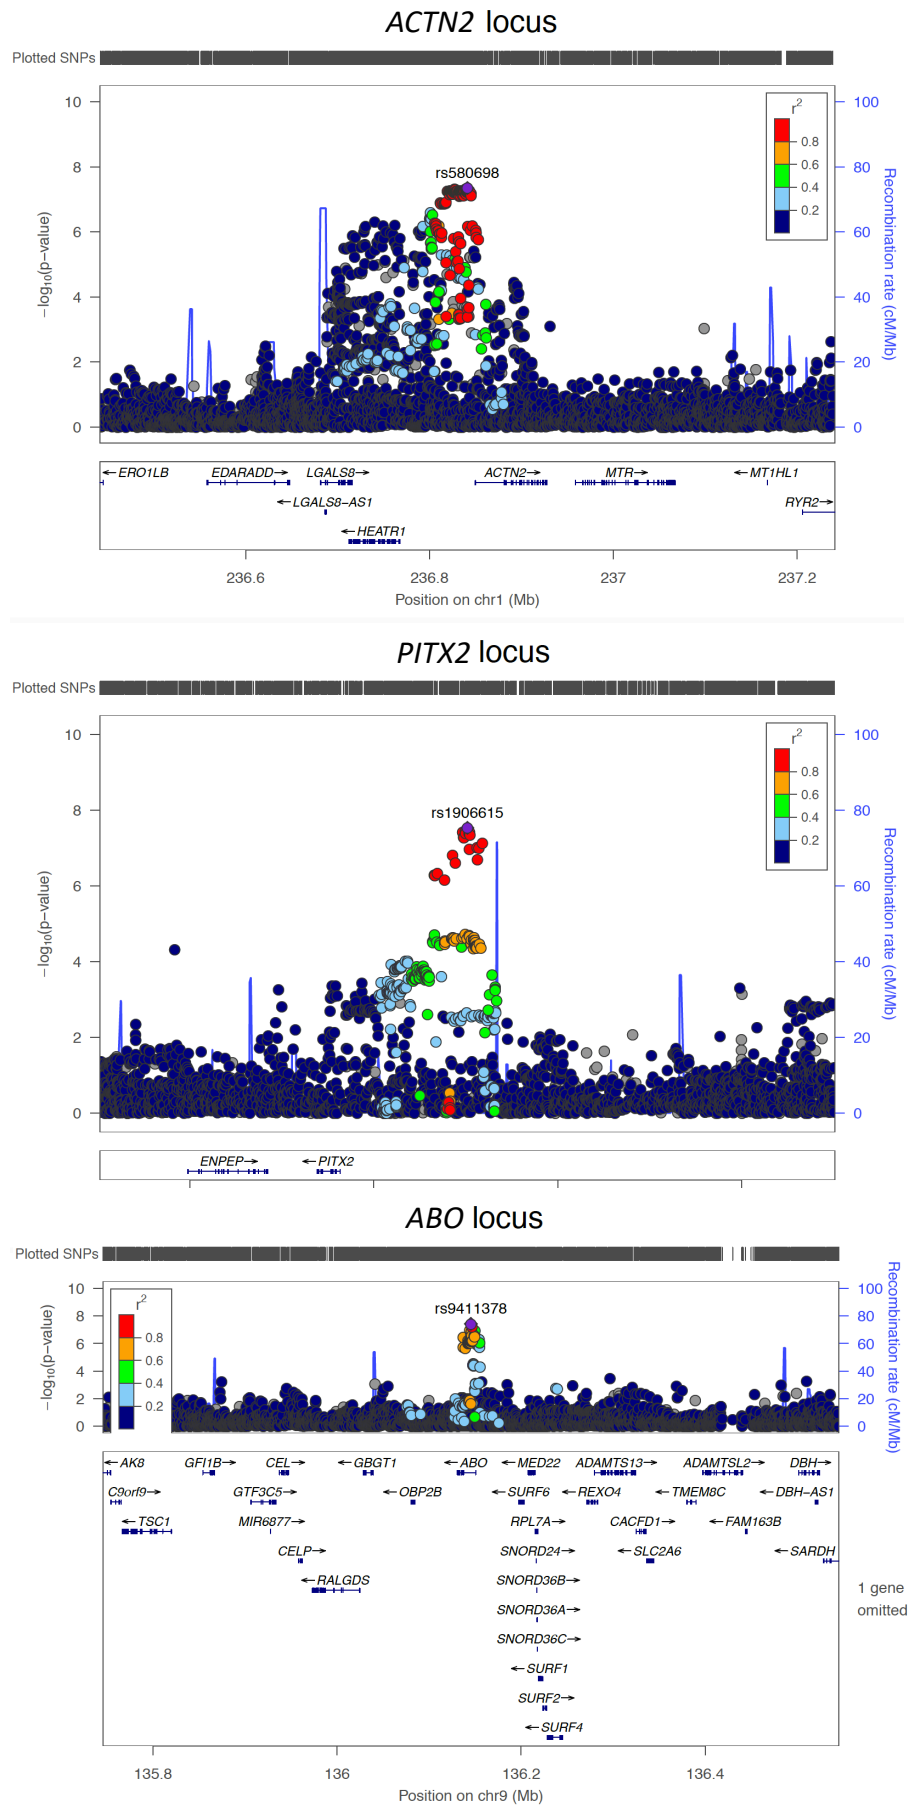

**Supplementary Figure 1.** LocusZoom plots for the genome-wide significant loci. SNPs are colored based on their LD with the sentinel locus SNP on the 1000 Genomes European reference panel. Chromosomal positions are based on hg38. N=448,549 independent participants.

# Supplementary Figure 2

**A**

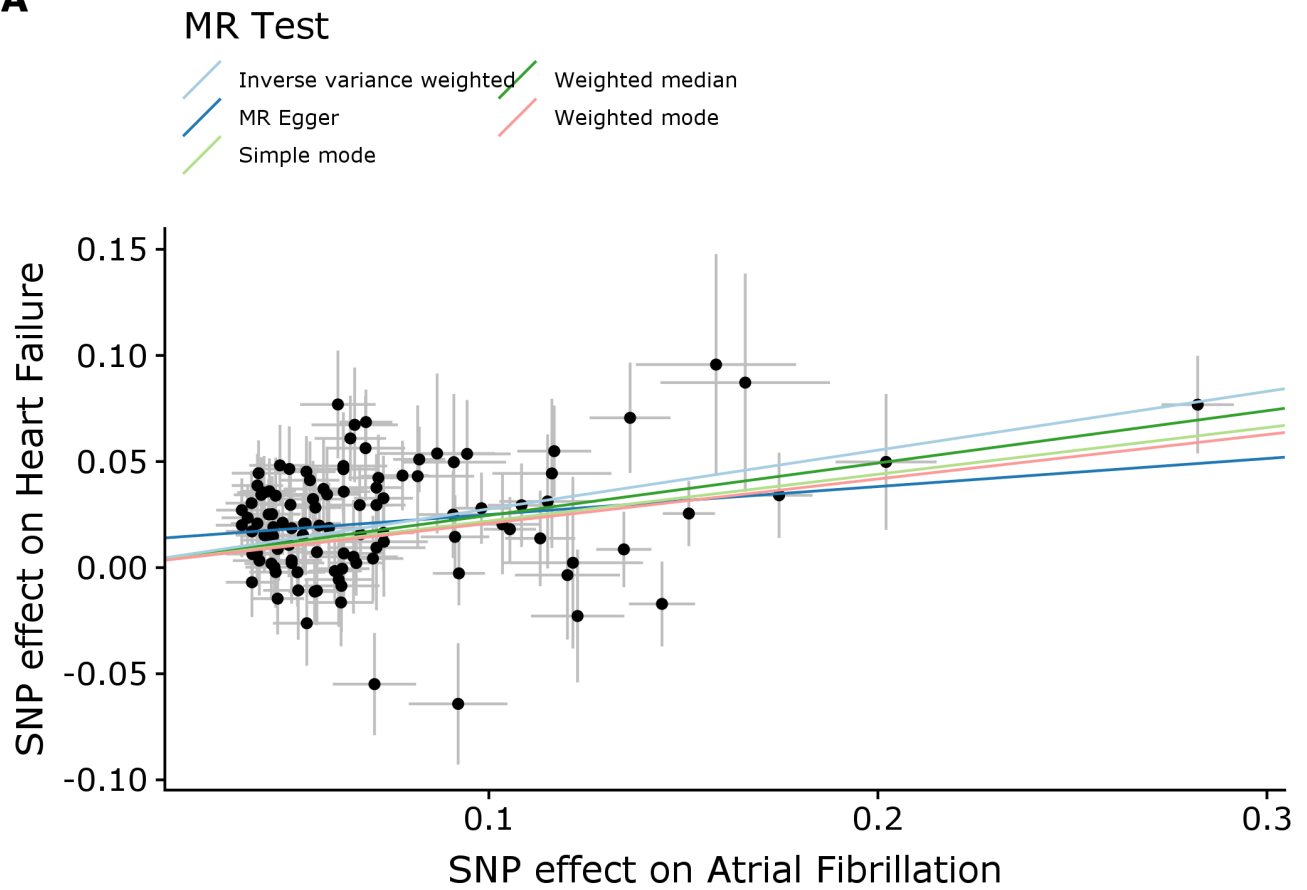

**B**

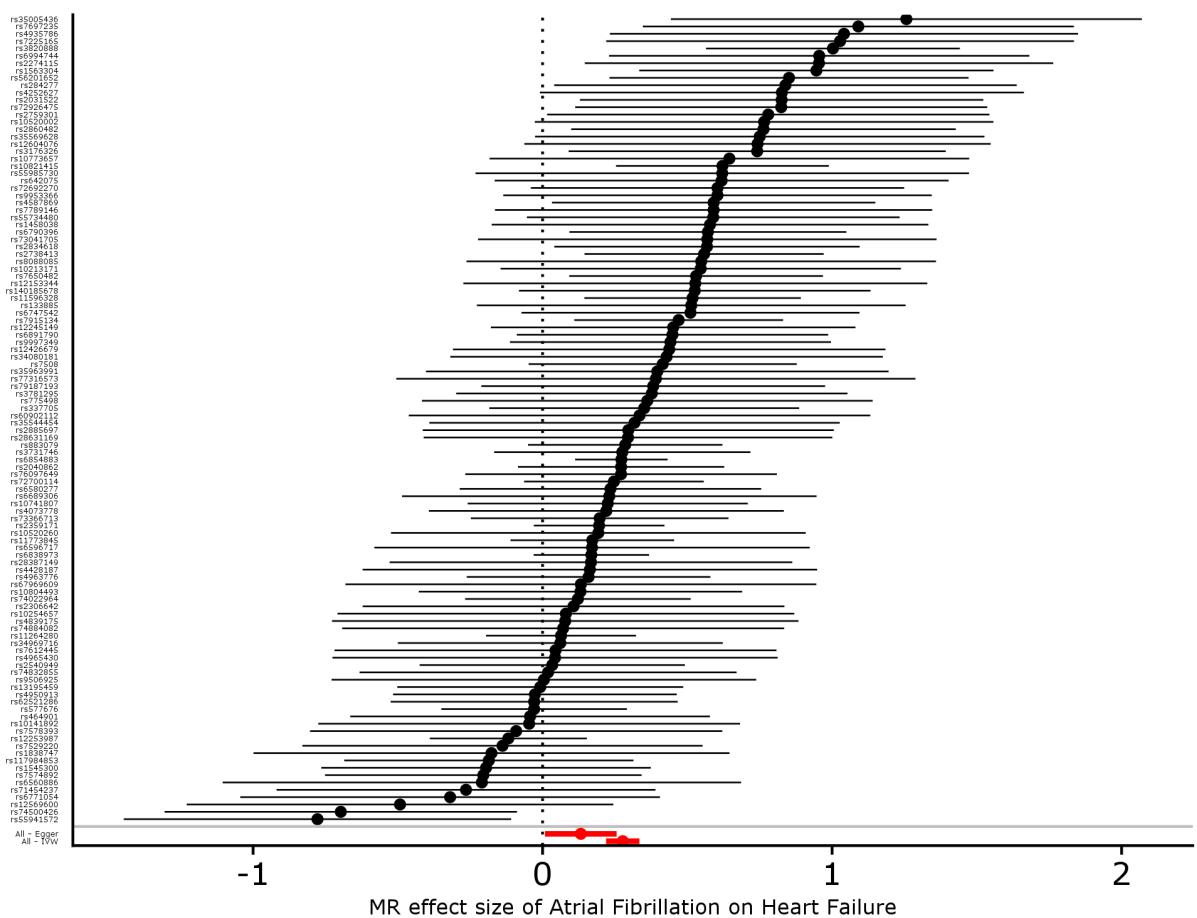

**Supplementary Figure 2.** Mendelian Randomization of the effect of Atrial Fibrillation on Heart Failure. **A.** Mendelian Randomization plot for the effect of genome-wide significant Atrial Fibrillation SNPs on Heart Failure. The effect size (logOR) of each SNP on Atrial Fibrillation is on the x axis, whereas the y axis shows the effect size of each SNP on Heart Failure. **B.** Mendelian Randomization Forrest plot for all individual instruments analyzed. Error bars represent the 95% confidence intervals of the estimate. Source data are provided as a Source Data file.

### Supplementary Figure 3

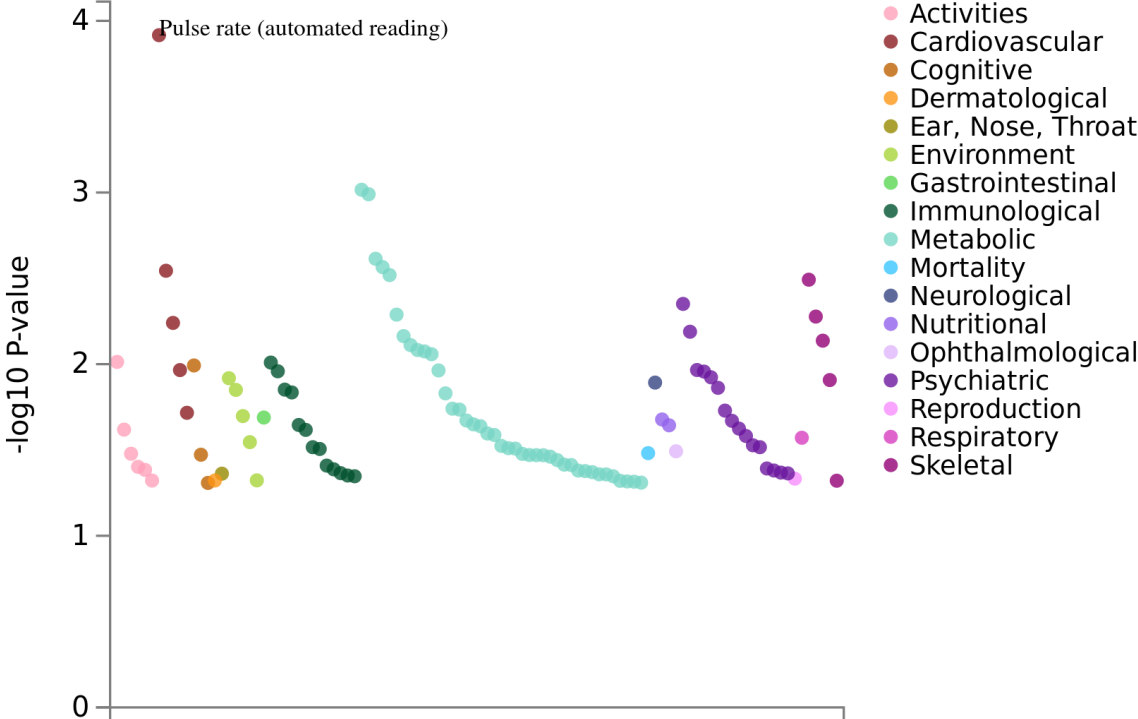

**Supplementary Figure 3.** PheWAS of the fine-mapped *ACTN2* locus variant (rs535411) in the GWAS Atlas. No association is significant after Bonferroni correction.

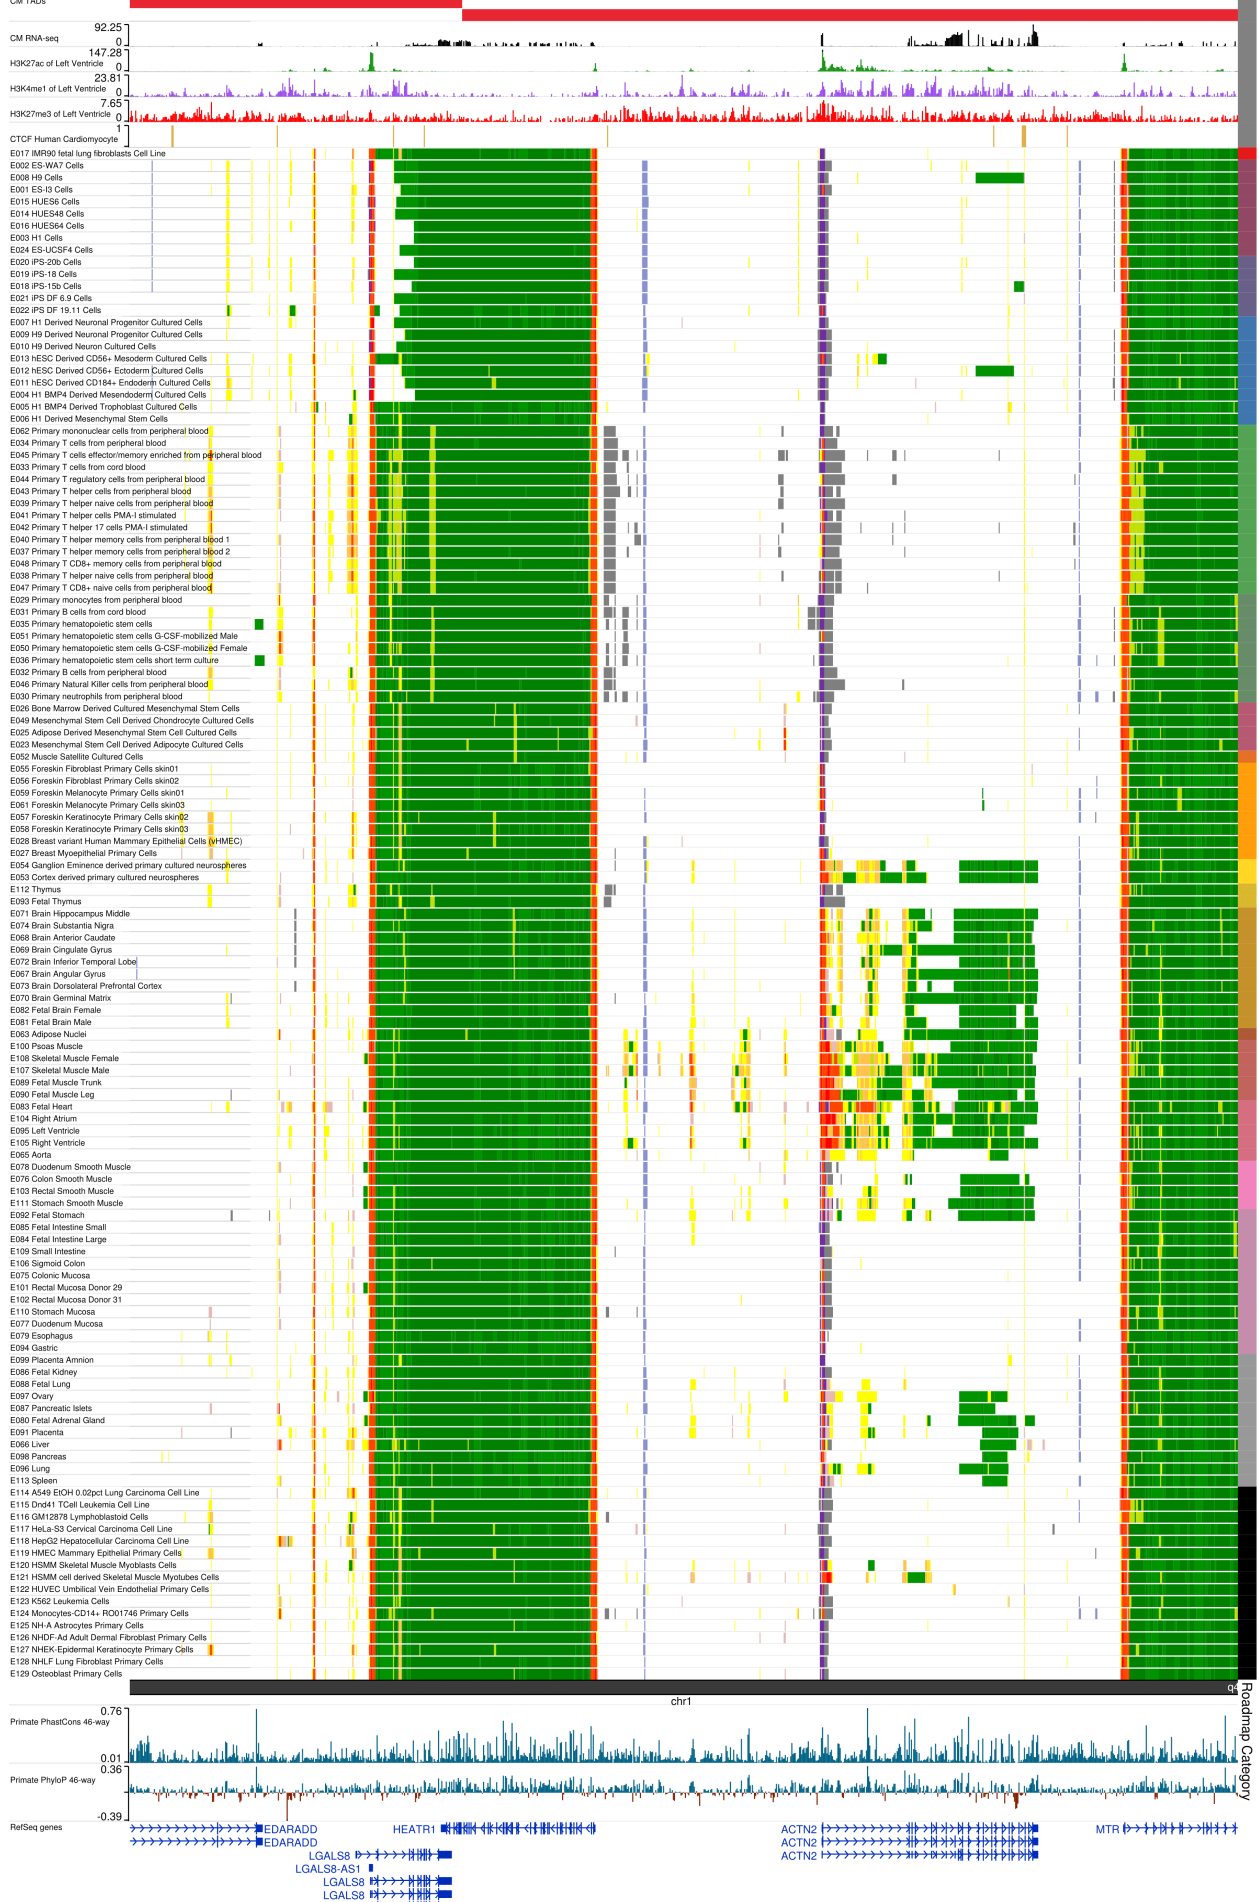

Supplementary Figure 4. Roadmap ChromHMM 25-state model annotations in all tested cell-types and tissues, H3K4me1, H3K4me3, H3K27ac peaks in left ventricle, cardiomyocyte topologically associated domains and PhyloP and PhastCons evolutionary conservation values.

## Supplementary Figure 5

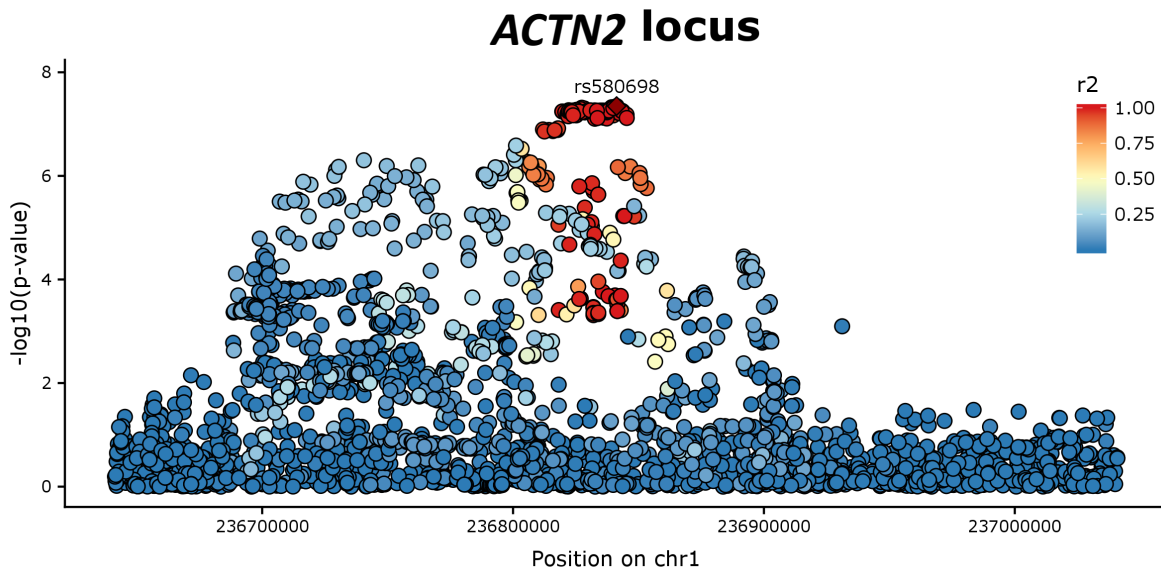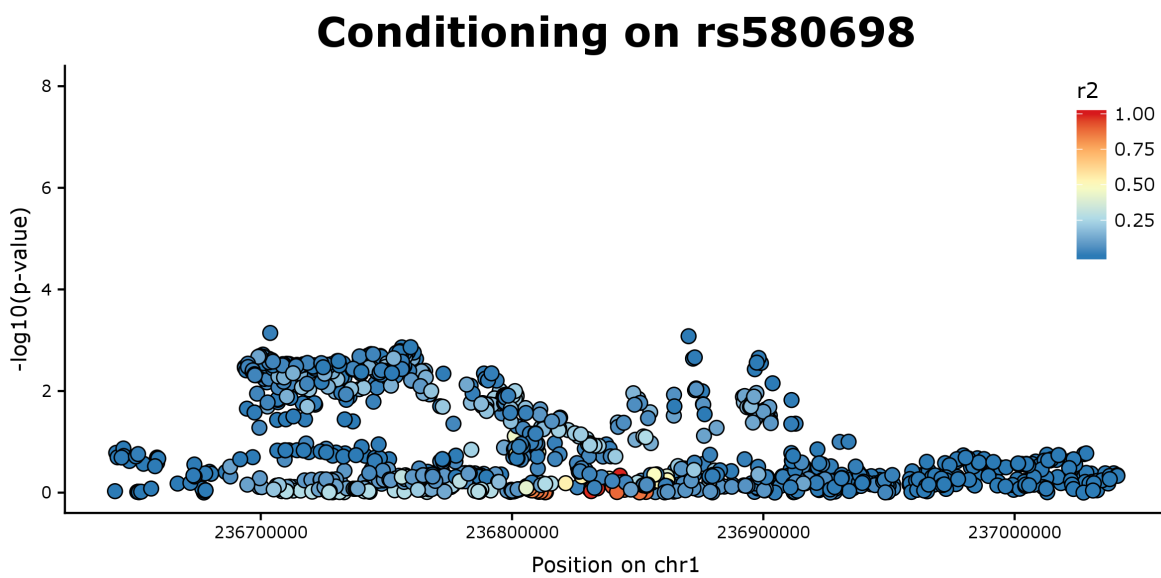

**Supplementary Figure 5.** Conditional analysis in the *ACTN2* locus. *ACTN2* locus Manhattan plot before (upper panel) and after (lower panel) conditioning on the sentinel locus variant (rs580698).

## Supplementary Figure 6

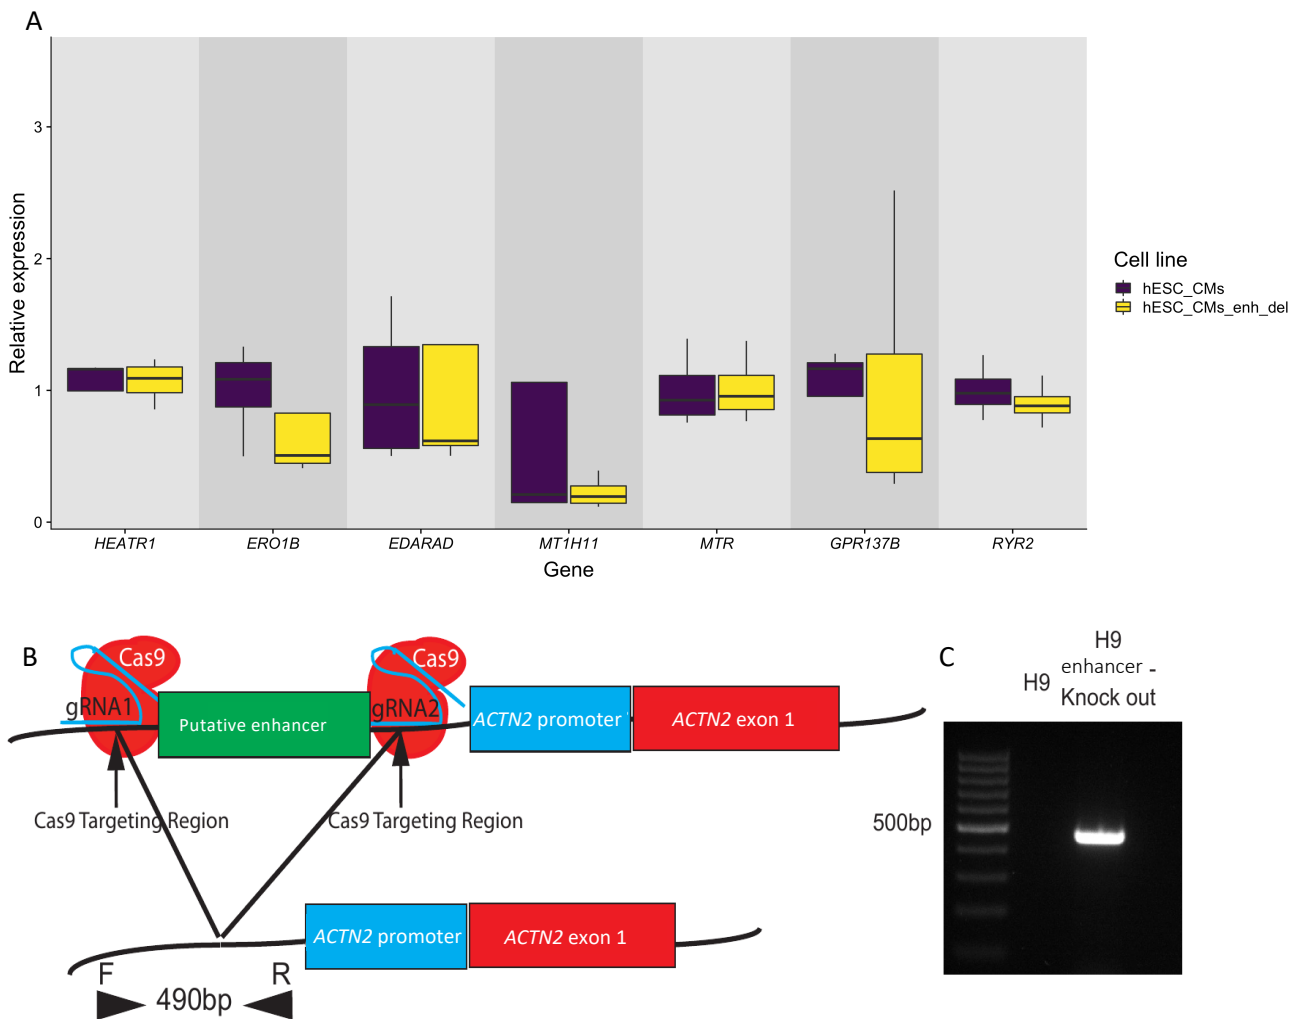

**Supplementary Figure 6.** Genome editing of the putative *ACTN2* locus enhancer. **A.** Differential expression of genes within 1Mb of the *ACTN2* locus sentinel SNP on Day 15 of cardiomyocyte differentiation between genome edited myocytes that carry the enhancer deletion and isogenic controls. All comparison p-values are  $>0.4$  ( $n=4$  independent biological replicates). Boxplot center line represents the median, the bounds represent the interquartile range (IQR) (25%-75%) and the whiskers extend from the bounds to the largest value no further than  $1.5 \times \text{IQR}$  from the bound. Data beyond the end of the whiskers are plotted individually. **B.** Schematic description of the CRISPR-Cas9 experiments. **C.** PCR of the edited cell lines show a  $\sim 500\text{bp}$  fragment consistent with the deleted enhancer region. Source data are provided as a Source Data file.

# Supplementary Figure 7

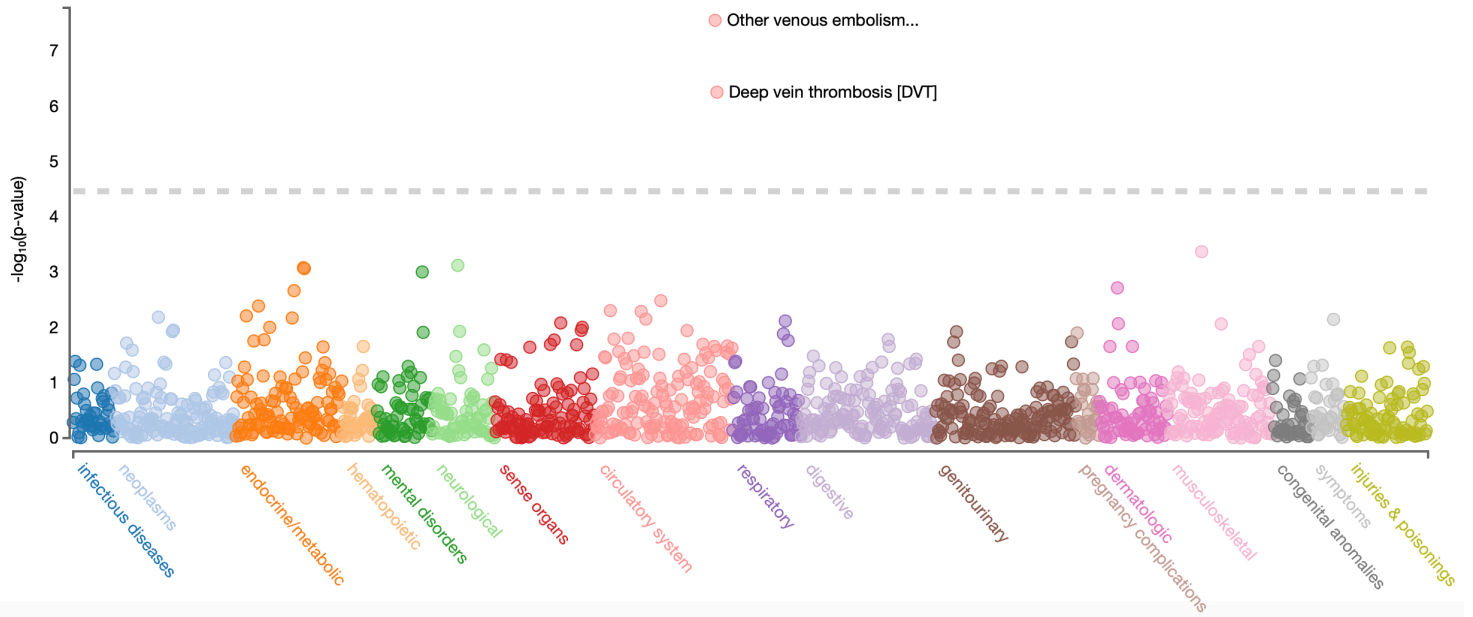

**Supplementary Figure 7.** PheWAS of the *ABO* locus sentinel variant (rs9411378) across 1,448 traits from the UK Biobank.



# Supplementary Figure 8

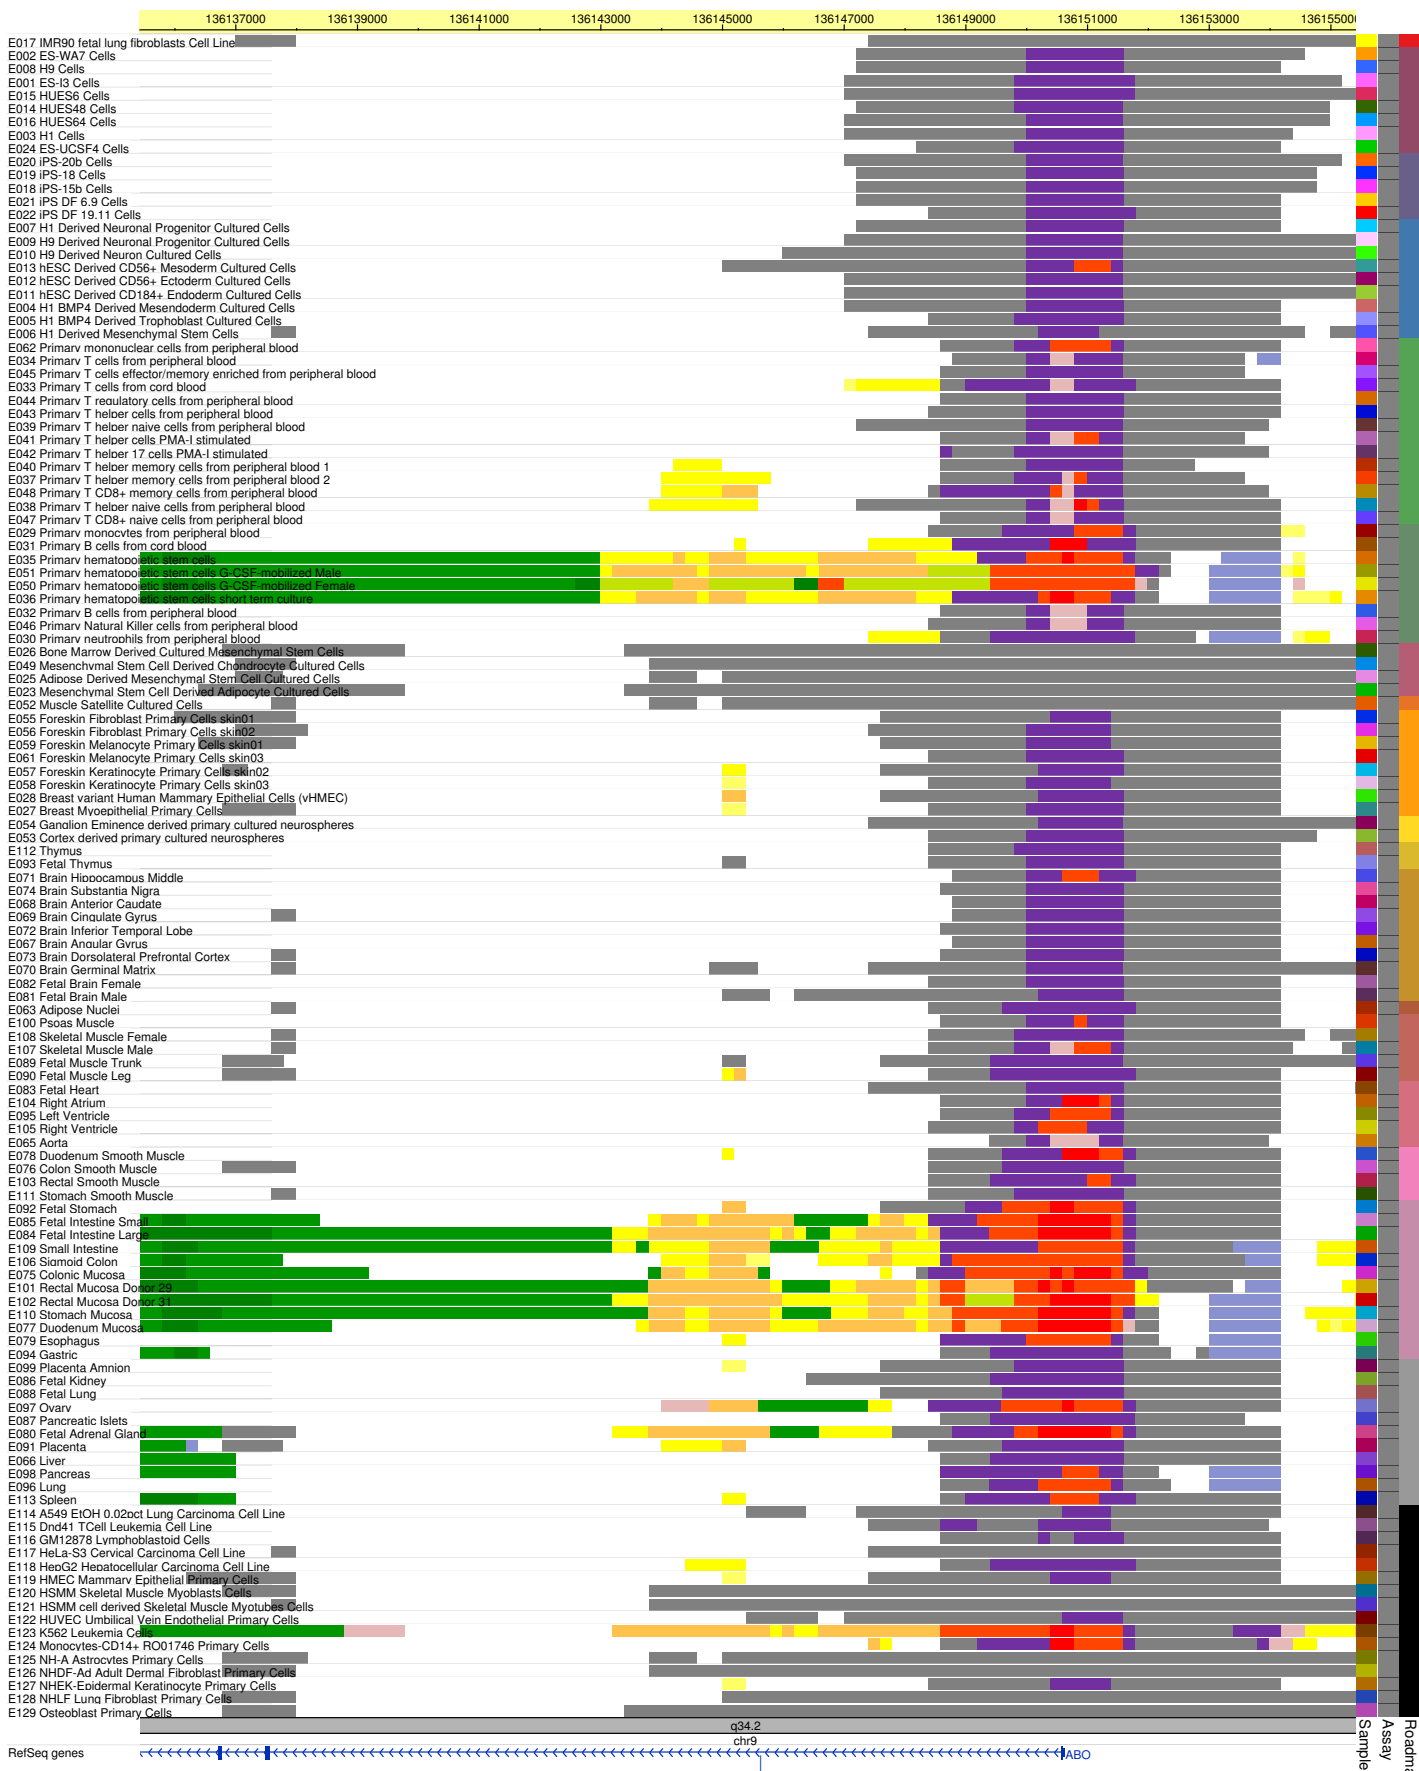

**Supplementary Figure 8.** Roadmap Epigenomics ChromHMM 25-state model across all tested tissues and cell types for the *ACTN2* locus. Visualization spans  $\pm 10$ KB from the sentinel locus variant.

Supplementary Figure 9

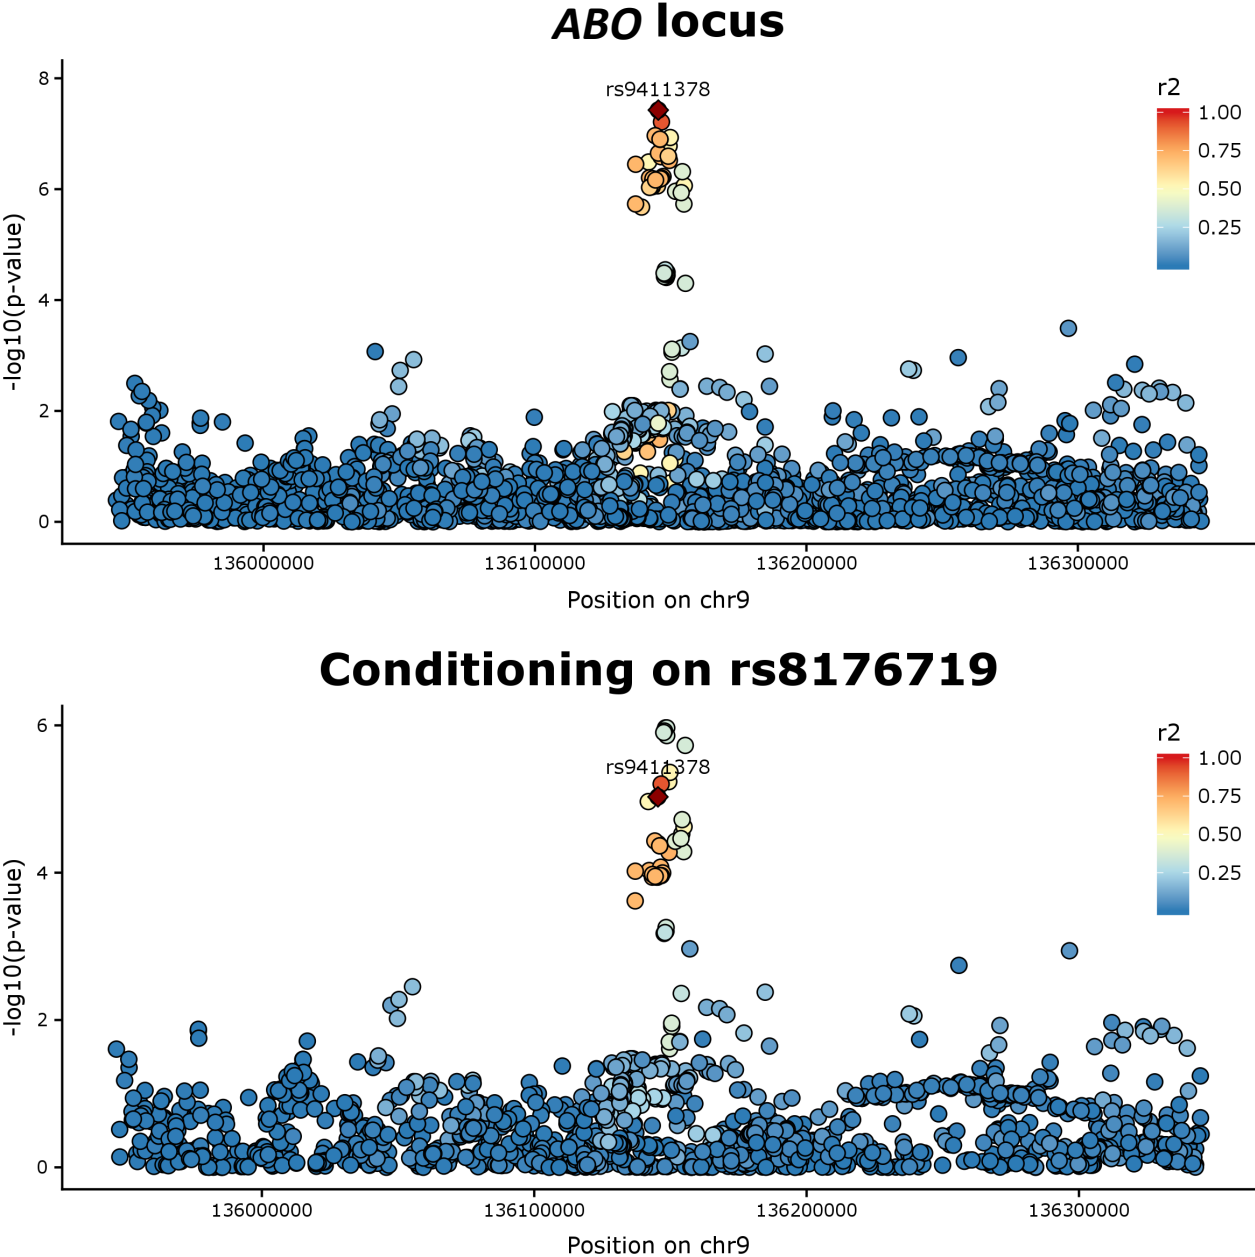

**Supplementary Figure 9.** Conditional analysis of the *ABO* locus. *ABO* locus Manhattan plot before (upper panel) and after (lower panel) conditioning on the frameshift variant (rs8176719) that determines blood type O.

## Supplementary Figure 10

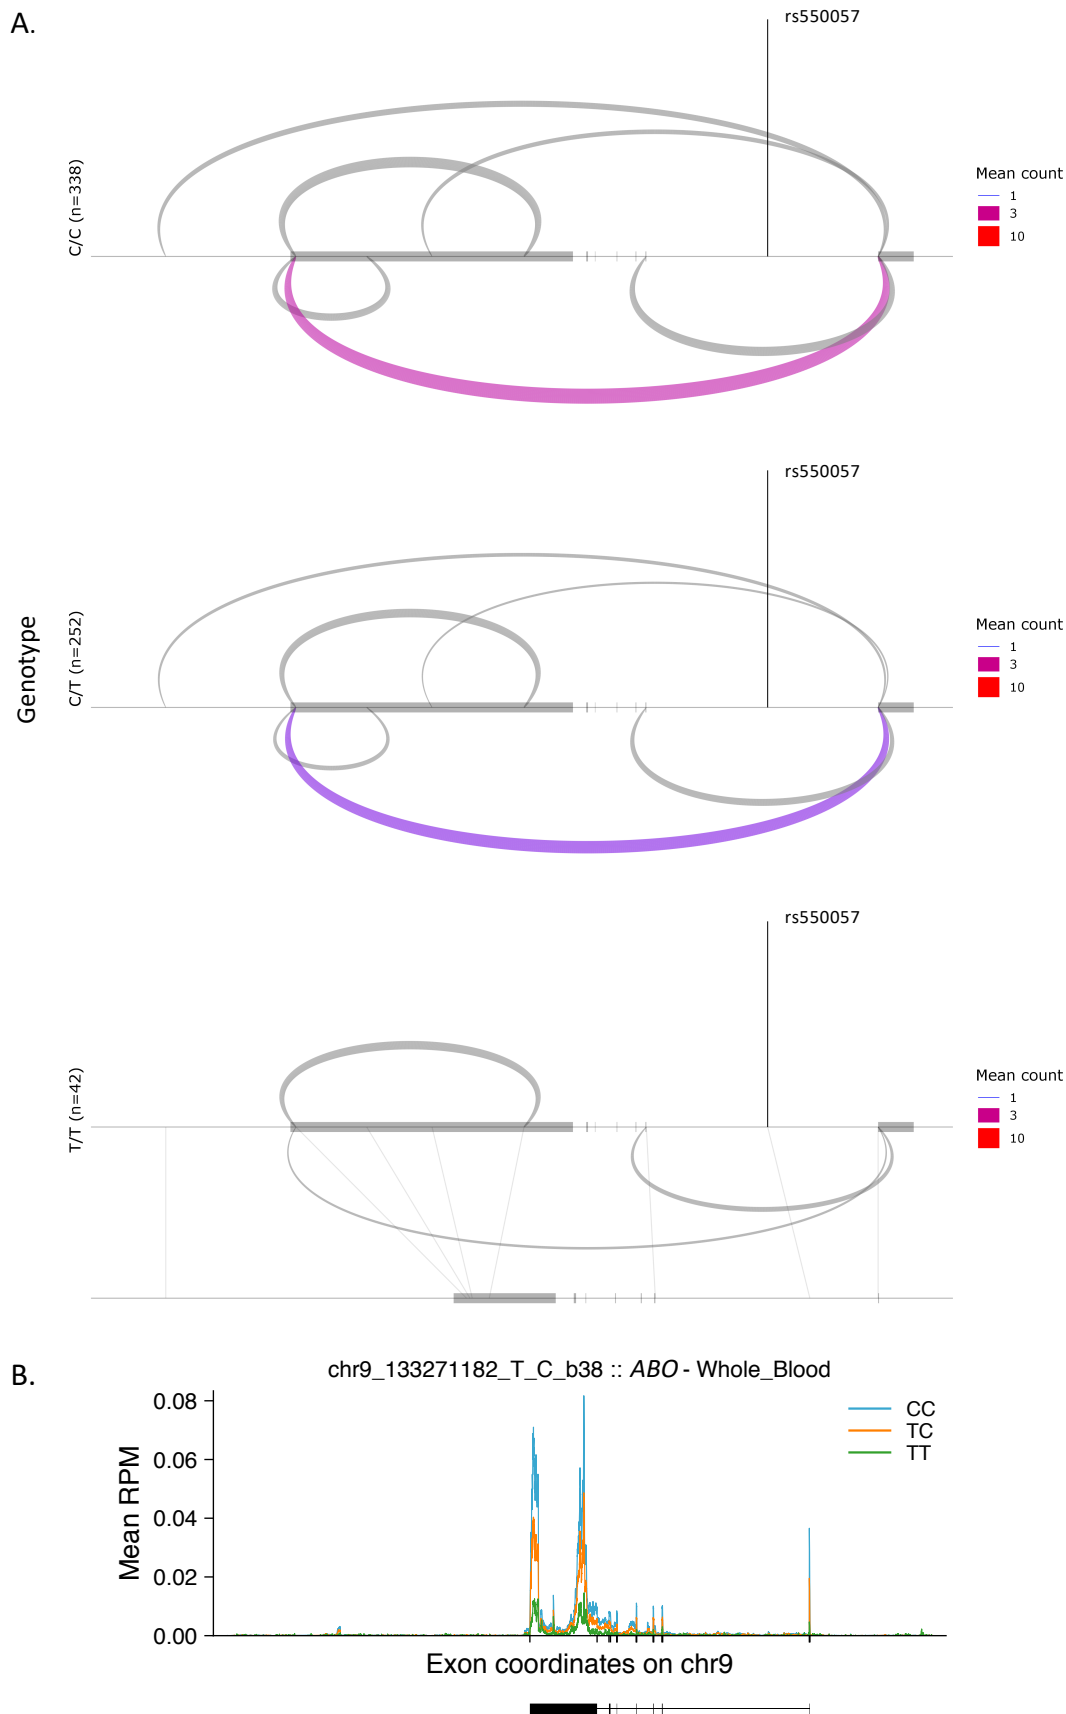

**Supplementary Figure 10.** Chromosome 9 locus variants affect splicing of the *ABO* gene. **A.** Differential splicing plot in GTEx v8 Whole Blood stratified based on the genotype of rs550057 (variant tagging our sentinel variant rs9411378 (LD  $r^2=0.92$  in 1000 Genomes Europeans)). We see that the C allele leads to increased expression of all splice variants of the *ABO* gene overall but disproportionate increase in the expression of the splicing variant denoted by the lowest arc. **B.** Read pile-up plot of the *ABO* gene in Whole Blood stratified by the genotype of rs550057. Source data are provided as a Source Data file.

**Supplementary Table 1.** Demographic comparison between the discovery and replication cohorts

|                         | <b>Discovery cohort</b> | <b>Replication cohort</b> |
|-------------------------|-------------------------|---------------------------|
| <b>Sex</b>              | 57% female              | 54% female                |
| <b>Age &lt;30 years</b> | 1%                      | 14%                       |
| <b>Age 30-45 years</b>  | 1%                      | 26%                       |
| <b>Age 45-60 years</b>  | 24%                     | 27%                       |
| <b>Age &gt;60 years</b> | 73%                     | 33%                       |
| <b>Non-US based</b>     | 91%                     | <5%                       |

\*Although it is unlikely based on the relative demographics of cohort participants, we should note that we cannot exclude the possibility that a small percentage of our Discovery cohort participants are also part of the 23andMe cohort

**Supplementary Table 2. Genetic correlation results**

| Trait 1 | Trait 2                       | Category            | rg     | se       | z        | P-value   | h2_obs | h2_obs_se | h2_int | h2_int_se | gcov_int | gcov_int_se |
|---------|-------------------------------|---------------------|--------|----------|----------|-----------|--------|-----------|--------|-----------|----------|-------------|
| CHF     | CHF                           | Cardiovascular      | 1      | 2.64E-07 | 3783.000 | 0         | 0.0091 | 0.0011    | 0.9901 | 0.0057    | 0.9901   | 0.0057      |
| CHF     | Cardiac.Dysrhythmias          | Cardiovascular      | 0.5219 | 0.06598  | 7.91     | 2.58E-15  | 0.018  | 0.002     | 1.023  | 0.0089    | 0.2002   | 0.0051      |
| CHF     | Hypertension                  | Cardiovascular      | 0.6791 | 0.0529   | 12.84    | 1.01E-37  | 0.0737 | 0.0038    | 1.1051 | 0.0141    | 0.1145   | 0.0065      |
| CHF     | Ischemic.Heart.Disease        | Cardiovascular      | 0.6312 | 0.05276  | 11.96    | 5.54E-33  | 0.034  | 0.0025    | 1.0388 | 0.0088    | 0.209    | 0.0053      |
| CHF     | Diseases.of.Connective.Tissue | Dermatologic        | 0.2329 | 0.1098   | 2.12     | 0.03401   | 0.0062 | 0.0012    | 1.0039 | 0.006     | 0.0083   | 0.0044      |
| CHF     | Hair.Diseases                 | Dermatologic        | 0.3448 | 0.1343   | 2.568    | 0.01021   | 0.0046 | 0.0019    | 1.0094 | 0.0068    | 0.0026   | 0.0044      |
| CHF     | Sebaceous.Gland.Diseases      | Dermatologic        | 0.3048 | 0.1056   | 2.885    | 0.003916  | 0.0067 | 0.002     | 1.0098 | 0.0068    | 5.00E-04 | 0.0044      |
| CHF     | Diabetes.Mellitus             | Endocrine           | 0.5307 | 0.05608  | 9.465    | 2.95E-21  | 0.0361 | 0.0023    | 1.0492 | 0.0097    | 0.0884   | 0.0054      |
| CHF     | Hypothyroidism                | Endocrine           | 0.2053 | 0.06274  | 3.272    | 0.001067  | 0.0292 | 0.003     | 1.0186 | 0.0097    | 0.0369   | 0.0051      |
| CHF     | Lipid.Disorders               | Endocrine           | 0.5724 | 0.05718  | 10.01    | 1.38E-23  | 0.031  | 0.0028    | 1.0533 | 0.0173    | 0.1245   | 0.0053      |
| CHF     | Abdominal.Hernia              | GI                  | 0.3142 | 0.06545  | 4.8      | 1.59E-06  | 0.0159 | 0.0016    | 0.8305 | 0.0061    | 0.0212   | 0.0039      |
| CHF     | Esophageal.Diseases           | GI                  | 0.3024 | 0.06269  | 4.824    | 1.41E-06  | 0.0239 | 0.0016    | 1.0312 | 0.0075    | 0.0326   | 0.0045      |
| CHF     | Gastritis.Duodenitis          | GI                  | 0.3767 | 0.08223  | 4.581    | 4.62E-06  | 0.0156 | 0.0014    | 1.0203 | 0.0064    | 0.0295   | 0.0049      |
| CHF     | Genital.Polyp                 | GU                  | 0.2997 | 0.1559   | 1.923    | 0.05449   | 0.0059 | 0.0022    | 1.0005 | 0.0061    | 0.0051   | 0.0045      |
| CHF     | Genital.Prolapse              | GU                  | 0.2632 | 0.07599  | 3.464    | 0.0005332 | 0.0251 | 0.003     | 1.0244 | 0.0074    | 7.00E-04 | 0.0047      |
| CHF     | Menopausal.Disorders          | GU                  | 0.6555 | 0.3283   | 1.997    | 0.04585   | 0.0029 | 0.002     | 1.0025 | 0.0058    | 0.0063   | 0.0045      |
| CHF     | Iron.Deficiency.Anemia        | Hematologic         | 0.3937 | 0.1366   | 2.882    | 0.003953  | 0.0046 | 0.0012    | 1.0043 | 0.0062    | 0.0452   | 0.0047      |
| CHF     | Megaloblastic.Anemia          | Hematologic         | 0.442  | 0.2389   | 1.8496   | 0.0644    | 0.0018 | 0.0012    | 1.0082 | 0.0065    | 0.0182   | 0.0044      |
| CHF     | Coagulopathy                  | Hematologic         | 0.7506 | 0.6318   | 1.1881   | 2.35E-01  | 0.0011 | 0.0013    | 1.0151 | 0.0073    | 0.0176   | 0.0046      |
| CHF     | Cellulitis/Abscess            | Infectious.Diseases | 0.4278 | 0.0969   | 4.4164   | 1.00E-05  | 0.0087 | 0.0019    | 0.9963 | 0.0084    | 0.0572   | 0.005       |
| CHF     | Pneumonia                     | Infectious.Diseases | 0.6629 | 0.1629   | 4.07     | 4.69E-05  | 0.0036 | 0.0012    | 1.0099 | 0.0061    | 0.1113   | 0.0045      |
| CHF     | Urinary.Tract.Infection       | Infectious.Diseases | 0.2907 | 0.1116   | 2.605    | 0.009198  | 0.004  | 0.001     | 0.9097 | 0.0056    | 0.0531   | 0.0037      |
| CHF     | Enthesopathies                | Musculoskeletal     | 0.3706 | 0.08571  | 4.324    | 1.54E-05  | 0.0149 | 0.0015    | 1.0002 | 0.0065    | 0.0082   | 0.0046      |
| CHF     | Intervertebral.Disk.Disorders | Musculoskeletal     | 0.6221 | 0.09212  | 6.754    | 1.44E-11  | 0.0098 | 0.0012    | 1.0152 | 0.0064    | 0.0077   | 0.0044      |
| CHF     | Osteoarthritis                | Musculoskeletal     | 0.327  | 0.06626  | 4.935    | 8.01E-07  | 0.0242 | 0.0027    | 1.023  | 0.0104    | 0.0376   | 0.0051      |
| CHF     | Benign.Colon.Neoplasms        | Neoplasms           | 0.1318 | 0.08076  | 1.632    | 0.1027    | 0.0131 | 0.0015    | 1.0384 | 0.0078    | 0.0165   | 0.0047      |
| CHF     | Breast.Cancer                 | Neoplasms           | 0.113  | 0.07493  | 1.508    | 0.1315    | 0.0137 | 0.002     | 1.0237 | 0.0084    | 0.0022   | 0.0043      |

|         |                                     |                |                  |             |                 |               |            |            |            |            |                 |        |
|---------|-------------------------------------|----------------|------------------|-------------|-----------------|---------------|------------|------------|------------|------------|-----------------|--------|
| CH<br>F | Skin.Cancer                         | Neoplasms      | 0.10<br>35       | 0.066<br>7  | 1.55<br>1       | 0.120<br>9    | 0.01<br>85 | 0.003<br>4 | 1.0<br>159 | 0.012<br>6 | -<br>0.003<br>9 | 0.0046 |
| CH<br>F | Inflammatory.and.Toxic.Neuropathies | Neurologic     | 0.37<br>78       | 0.144<br>9  | 2.60<br>8       | 0.009<br>116  | 0.00<br>31 | 0.001<br>1 | 0.9<br>734 | 0.005<br>8 | 0.016<br>6      | 0.0042 |
| CH<br>F | Facial.Nerve.Disorders              | Neurologic     | 0.33<br>94       | 0.252<br>9  | 1.34<br>23      | 1.80E<br>-01  | 0.00<br>13 | 0.001<br>1 | 0.9<br>944 | 0.005<br>5 | 0.002<br>6      | 0.0044 |
| CH<br>F | Parkinson's.Disease                 | Neurologic     | 0.07<br>6        | 0.185<br>9  | 0.40<br>89      | 0.682<br>63   | 0.00<br>23 | 0.001<br>2 | 1.0<br>039 | 0.005<br>8 | 0.007<br>1      | 0.0044 |
| CH<br>F | Alcohol-related.Disorders           | Psychiatric    | 0.25             | 0.087<br>76 | 2.84<br>8       | 0.004<br>397  | 0.01<br>03 | 0.001<br>3 | 1.0<br>158 | 0.006<br>3 | 0.047<br>6      | 0.0047 |
| CH<br>F | Mood.Disorders                      | Psychiatric    | 0.41<br>46       | 0.077<br>53 | 5.34<br>8       | 8.89E<br>-08  | 0.01<br>68 | 0.001<br>5 | 0.9<br>966 | 0.006<br>6 | 0.034<br>9      | 0.0045 |
| CH<br>F | Tobacco.Use.Disorder                | Psychiatric    | 0.49<br>77       | 0.067<br>99 | 7.31<br>9       | 2.49E<br>-13  | 0.02<br>85 | 0.001<br>8 | 1.0<br>165 | 0.007<br>1 | 0.071           | 0.0051 |
| CH<br>F | Asthma                              | Respiratory    | 0.47<br>67       | 0.059<br>21 | 8.05            | 8.27E<br>-16  | 0.03<br>4  | 0.002<br>9 | 1.0<br>352 | 0.010<br>4 | 0.034<br>7      | 0.0048 |
| CH<br>F | Chronic.Airway.Obstruction          | Respiratory    | 0.56<br>1        | 0.073<br>16 | 7.66<br>8       | 1.75E<br>-14  | 0.01<br>91 | 0.001<br>8 | 1.0<br>021 | 0.007<br>6 | 0.092<br>6      | 0.0045 |
| CH<br>F | Nasal.Septum.Deviation              | Respiratory    | 0.12<br>69       | 0.177<br>7  | 0.71<br>42      | 0.475<br>12   | 0.00<br>22 | 0.001<br>2 | 1.0<br>124 | 0.006<br>2 | 0.006<br>1      | 0.0045 |
| CH<br>F | Cataract                            | Sensory        | 0.28<br>31       | 0.079<br>26 | 3.57<br>2       | 0.000<br>3548 | 0.01<br>5  | 0.001<br>5 | 1.0<br>165 | 0.007<br>1 | 0.027<br>5      | 0.0046 |
| CH<br>F | Glaucoma                            | Sensory        | 0.14<br>49       | 0.095<br>12 | 1.52<br>3       | 0.127<br>6    | 0.00<br>86 | 0.001<br>4 | 1.0<br>059 | 0.006<br>9 | 0.004<br>8      | 0.0042 |
| CH<br>F | Retinal.Detachment                  | Sensory        | -<br>0.06<br>076 | 0.092<br>67 | -<br>0.65<br>57 | 0.512         | 0.00<br>92 | 0.001<br>4 | 0.9<br>994 | 0.006<br>7 | 0.003<br>9      | 0.0045 |
| CH<br>F | Atrial.fibrillation.or.flutter      | Cardiovascular | 0.49<br>49       | 0.056<br>38 | 8.77<br>8       | 1.66E<br>-18  | 0.02<br>61 | 0.003<br>2 | 1.0<br>171 | 0.011<br>2 | 0.205<br>6      | 0.0053 |
| CH<br>F | Conduction.disease                  | Cardiovascular | 0.54<br>04       | 0.117<br>8  | 4.58<br>7       | 4.49E<br>-06  | 0.00<br>46 | 0.001<br>2 | 1.0<br>128 | 0.006<br>9 | 0.194<br>1      | 0.0046 |
| CH<br>F | Congenital.heart.disease            | Cardiovascular | 0.27<br>12       | 0.185<br>7  | 1.46            | 0.144<br>2    | 0.00<br>24 | 0.001<br>1 | 0.9<br>99  | 0.006<br>2 | 0.084<br>5      | 0.0044 |

**Supplementary Table 3. Colocalization analysis for the *ACTN2* locus.** All genes within 1MB from the sentinel locus SNP that passed the standard GTEx filters in at least one tissue were tested.

| Gene            | Gene Symbol       | Posterior Colocalization probability |                      |                        |
|-----------------|-------------------|--------------------------------------|----------------------|------------------------|
|                 |                   | Whole Blood                          | Heart Left Ventricle | Heart Atrial Appendage |
| ENSG00000198626 | <i>RYR2</i>       | NA                                   | 0.256                | 5.00E-06               |
| ENSG00000244020 | <i>MT1HL1</i>     | NA                                   | 0.0482               | 0.043                  |
| ENSG00000237991 | <i>RPL35P1</i>    | 3.00E-02                             | 0.0401               | 0.0645                 |
| ENSG00000116984 | <i>MTR</i>        | 1.40E-02                             | 3.57E-02             | 2.14E-03               |
| ENSG00000230325 | <i>AL359921.1</i> | 6.09E-03                             | 0.0301               | 2.85E-03               |
| ENSG00000273058 | <i>AL359921.2</i> | 0.028                                | 0.0446               | 0.0757                 |
| ENSG00000223776 | <i>LGALS8-AS1</i> | 2.99E-02                             | 0.0574               | 2.12E-02               |
| ENSG00000186197 | <i>EDARADD</i>    | 0.0327                               | 4.33E-06             | 0.0951                 |
| ENSG00000086619 | <i>ERO1B</i>      | 4.43E-05                             | 3.29E-06             | 3.20E-06               |
| ENSG00000235371 | <i>AL122018.1</i> | NA                                   | 5.62E-02             | NA                     |
| ENSG00000077585 | <i>GPR137B</i>    | 4.33E-06                             | 1.08E-04             | 4.64E-06               |
| ENSG00000119285 | <i>HEATR1</i>     | 1.62E-01                             | 2.54E-02             | 1.77E-01               |
| ENSG00000077522 | <i>ACTN2</i>      | 0.0256                               | 0.0416               | 1.19E-02               |
| ENSG00000116977 | <i>LGALS8</i>     | 3.18E-04                             | 3.11E-04             | 3.21E-04               |

**Supplementary Table 4.** HiC interaction data of the ATAC-seq peak containing rs535411 with nearby gene promoters (within 1Mb of the peak).

| Ensembl_ID      | Gene Name                | Start_site .hg19. | bin_start     | bin_end       | Expected interaction counts | Observed interaction counts | p-value        | Bonferroni adjusted p-value |
|-----------------|--------------------------|-------------------|---------------|---------------|-----------------------------|-----------------------------|----------------|-----------------------------|
| ENSG00000077522 | <i>ACTN2</i>             | 23684975<br>4     | 23684<br>5000 | 23685<br>0000 | 29.7701971                  | 54.1604195                  | 2.22E-05       | 0.00035486                  |
| ENSG00000077585 | <i>GPR137B</i>           | 23630583<br>2     | 23630<br>5000 | 23631<br>0000 | NA                          | 0                           | NA             | NA                          |
| ENSG00000086619 | <i>ERO1B</i>             | 23644531<br>9     | 23644<br>5000 | 23645<br>0000 | 4.79375661                  | 2.58241296                  | 0.8568<br>6779 | 1                           |
| ENSG00000116977 | <i>LGALS8</i>            | 23668130<br>0     | 23668<br>0000 | 23668<br>5000 | 8.5275051                   | 3.21627092                  | 0.9704<br>5867 | 1                           |
| ENSG00000116984 | <i>MTR</i>               | 23695861<br>0     | 23695<br>5000 | 23696<br>0000 | 8.66605039                  | 11.5206499                  | 0.1658<br>4347 | 1                           |
| ENSG00000119285 | <i>HEATR1</i>            | 23676780<br>4     | 23676<br>5000 | 23677<br>0000 | 15.880334                   | 22.7408381                  | 0.0546<br>157  | 0.8738511                   |
| ENSG00000186197 | <i>EDARA<br/>DD</i>      | 23651156<br>2     | 23651<br>0000 | 23651<br>5000 | 5.36150723                  | 2.79916596                  | 0.9026<br>7639 | 1                           |
| ENSG00000198626 | <i>RYR2</i>              | 23720550<br>5     | 23720<br>5000 | 23721<br>0000 | 4.74287934                  | 3.23828477                  | 0.6970<br>1257 | 1                           |
| ENSG00000223776 | <i>LGALS8-<br/>ASI</i>   | 23668780<br>8     | 23668<br>5000 | 23669<br>0000 | 8.66605039                  | 10.8190117                  | 0.2552<br>2745 | 1                           |
| ENSG00000230325 | <i>RP11-<br/>385F5.4</i> | 23671358<br>0     | 23671<br>0000 | 23671<br>5000 | 9.86522201                  | 8.2221694                   | 0.6518<br>0184 | 1                           |
| ENSG00000235371 | <i>AL1220<br/>18.1</i>   | 23627336<br>1     | 23627<br>0000 | 23627<br>5000 | 3.88129471                  | 8.16006517                  | 0.0180<br>3509 | 0.2885615                   |
| ENSG00000237991 | <i>RPL35P<br/>I</i>      | 23714463<br>7     | 23714<br>0000 | 23714<br>5000 | NA                          | 0                           | NA             | NA                          |
| ENSG00000244020 | <i>MTIHL<br/>I</i>       | 23716771<br>8     | 23716<br>5000 | 23717<br>0000 | NA                          | 0                           | NA             | NA                          |
| ENSG00000273058 | <i>GC01P2<br/>35916</i>  | 23670000<br>4     | 23670<br>0000 | 23670<br>5000 | 9.32864823                  | 5.36500371                  | 0.9028<br>5862 | 1                           |
| ENSG00000222650 | <i>RNU2-<br/>70P</i>     | 23643108<br>0     | 23643<br>0000 | 23643<br>5000 | 4.69205217                  | 2.94112492                  | 0.8468<br>9934 | 1                           |
| ENSG00000226498 | <i>RPSAP2<br/>I</i>      | 23698293<br>4     | 23698<br>0000 | 23698<br>5000 | 7.86494309                  | 8.1101315                   | 0.3886<br>0776 | 1                           |
| ENSG00000237922 | <i>AL4503<br/>09.1</i>   | 23645026<br>0     | 23645<br>0000 | 23645<br>5000 | 4.8687276                   | 5.75373614                  | 0.3610<br>1872 | 1                           |
| ENSG00000244457 | <i>ENO1P<br/>I</i>       | 23664646<br>5     | 23664<br>5000 | 23665<br>0000 | 7.45443987                  | 5.53392386                  | 0.7535<br>4255 | 1                           |
| ENSG00000252396 | <i>RN7SKP<br/>195</i>    | 23728410<br>7     | 23728<br>0000 | 23728<br>5000 | 4.29116606                  | 3.23810148                  | 0.6212<br>5562 | 1                           |

Observed and expected counts are based on average of two replicates on day 80 of cardiomyocyte differentiation. P-values are based on the upper tail of a Poisson distribution with lambda the corresponding expected count number.

NA: Not able to perform estimation because of zero observed interaction counts for that region.



**Supplementary Table 5.** Splice-eQTL results for rs550057 in GTEx\_v8 Whole Blood.

| <b>Intron coordinates in hg38</b> | <b>P-value</b> | <b>Normalized effect size</b> |
|-----------------------------------|----------------|-------------------------------|
| 9:133233609:133275162             | 2.40E-05       | -0.261937                     |
| 9:133251152:133251353             | 0.001945       | -0.204811                     |
| 9:133251152:133252478             | 6.87E-08       | -0.366985                     |
| 9:133251152:133275162             | 0.252871       | 0.0927417                     |
| 9:133251487:133275162             | 2.35E-08       | -0.399456                     |
| 9:133262168:133275162             | 3.71E-06       | -0.30869                      |

\*Effect size and p-values correspond to the relative intron excision ratios as calculated by LeafCutter

**Supplementary Table 6. Heart Failure Definitions Among the Different Cohorts**

| <b>Cohort</b> | <b>Heart Failure Definition</b>                                                                                                                                                                                                                                             |
|---------------|-----------------------------------------------------------------------------------------------------------------------------------------------------------------------------------------------------------------------------------------------------------------------------|
| ARIC          | Hospitalization with a heart failure diagnosis according to ICD codes in any position or a death certificate with death from heart failure in any position                                                                                                                  |
| CHS           | The participant must have both a congestive heart failure diagnosis by a physician and be under treatment with medications for congestive heart failure                                                                                                                     |
| Framingham    | A definite diagnosis of congestive heart failure requires that a minimum of two major or one major and two minor criteria* be present concurrently. The presence of other conditions capable of producing the symptoms and signs are considered in evaluating the findings. |
| MESA          | Heart failure presence adjudicated by MESA investigators based on presence of symptoms and imaging findings attributable to heart failure along with a diagnosis of heart failure by a physician and medical treatment for heart failure.                                   |
| WHI           | The participant must have both a congestive heart failure diagnosis by a physician and be under treatment with medications for congestive heart failure                                                                                                                     |
| eMERGE        | Presence of ICD codes for heart failure and positive mention of heart failure in the participant's problem list based on either natural language processing or a structured problem list.                                                                                   |
| UK Biobank    | Hospitalization with a heart failure diagnosis according to ICD codes in any position                                                                                                                                                                                       |

ICD: International Classification of Disease

**\*Criteria used for heart failure diagnosis in the Framingham Study:**

Major Criteria:

1. Paroxysmal nocturnal dyspnea or orthopnea;
2. Distended neck veins (in other than the supine position);
3. Rales;
4. Increasing heart size by x-ray;
5. Acute pulmonary edema on chest x-ray;
6. Ventricular S(3) gallop;
7. Increased venous pressure > 16 cm H<sub>2</sub>O;
8. Hepatojugular reflux;
9. Pulmonary edema, visceral congestion, cardiomegaly shown on autopsy;
10. Weight loss on CHF Rx: 10 lbs./5days.

Minor criteria:

1. Bilateral ankle edema;
2. Night cough;
3. Dyspnea on ordinary exertion;
4. Hepatomegaly;
5. Pleural effusion by x-ray;
6. Decrease in vital capacity by one-third from maximum record;
7. Tachycardia (120 beats per minute or more);
8. Pulmonary vascular engorgement on chest x-ray.

**Supplementary Table 7. Absolute qPCR normalized expression values and primer list used in the hESC-CM CRISPR experiments**

| <b>H9 hESC-CM expression</b>                          |                                 |          |          |          |
|-------------------------------------------------------|---------------------------------|----------|----------|----------|
| <i>ACTN2</i>                                          | 0.028446                        | 0.024499 | 0.030406 | 0.019    |
| <i>HEATR1</i>                                         | 0.005774                        | 0.005787 | 0.005843 | 0.002513 |
| <i>ERO1B</i>                                          | 0.000592                        | 0.00052  | 0.000444 | 0.000222 |
| <i>EDARAD</i>                                         | 0.000125                        | 8.78E-05 | 3.66E-05 | 4.22E-05 |
| <i>MT1H11</i>                                         | 3.94E-06                        | 7.08E-06 | 3.81E-06 | 9.05E-05 |
| <i>MTR</i>                                            | 0.005638                        | 0.00621  | 0.010392 | 0.007613 |
| <i>GPR137B</i>                                        | 0.000488                        | 0.000436 | 0.000453 | 0.00015  |
| <i>RYR2</i>                                           | 0.009976                        | 0.013559 | 0.010958 | 0.008284 |
| <b>H9 hESC-CMs ACTN2 enhancer deletion expression</b> |                                 |          |          |          |
| <i>ACTN2</i>                                          | 0.017128                        | 0.017251 | 0.011103 | 0.008601 |
| <i>HEATR1</i>                                         | 0.004261                        | 0.006151 | 0.005101 | 0.005769 |
| <i>ERO1B</i>                                          | 0.000204                        | 0.000182 | 0.000246 | 0.000733 |
| <i>EDARAD</i>                                         | 4.43E-05                        | 3.67E-05 | 4.56E-05 | 0.000256 |
| <i>MT1H11</i>                                         | 4.01E-06                        | 3.08E-06 | 6.21E-06 | 1.03E-05 |
| <i>MTR</i>                                            | 0.007663                        | 0.005718 | 0.006597 | 0.010266 |
| <i>GPR137B</i>                                        | 0.000155                        | 0.000111 | 0.000329 | 0.000961 |
| <i>RYR2</i>                                           | 0.009262                        | 0.011896 | 0.007681 | 0.009613 |
| <b>PCR Primer List</b>                                |                                 |          |          |          |
| <i>ACTN2</i> For                                      | ATGGCCTTGGACTCTGTGC             |          |          |          |
| <i>ACTN2</i> Rev                                      | GGTGTTACGATGTCTTCAGC            |          |          |          |
| <i>MTR</i> For                                        | CTTGGCCTACCGGATGAACAT           |          |          |          |
| <i>MTR</i> Rev                                        | TGCCACAAACCTCTTAATTCCTG         |          |          |          |
| <i>ERADAD</i> For                                     | CCATTCAAGATACGGAACTCCC          |          |          |          |
| <i>ERADAD</i> Rev                                     | AGCAAGTCACTTATGGTGGGG           |          |          |          |
| <i>ERO1B</i> For                                      | TTCTGGATGATTGCTTGTGTGAT         |          |          |          |
| <i>ERO1B</i> Rev                                      | GGTCGCTTCAGATTAACCTTGT          |          |          |          |
| <i>GPR137B</i> For                                    | CTTGTA CTTCACGCAGGTGAT          |          |          |          |
| <i>GPR137B</i> Rev                                    | CCAATTTCCCGTCTTTACCAGC          |          |          |          |
| <i>HEATR1</i> For                                     | GCCCTCCCTCAAAGTGATGC            |          |          |          |
| <i>HEATR1</i> Rev                                     | CGCTTCCTTAGGGTCAAATAACA         |          |          |          |
| <i>MT1H11</i> For                                     | GCAAGTGCAAAAAGTGCAAA            |          |          |          |
| <i>MT1H11</i> Rev                                     | CCCGGACTTTACGTGCATT             |          |          |          |
| <i>RYR2</i> For                                       | ACAACAGAAGCTATGCTTGGC           |          |          |          |
| <i>RYR2</i> Rev                                       | GAGGAGTGTTTCGATGACCACC          |          |          |          |
| rs535411 Screening Primer For                         | GGGGGTGCTCCTATACCAAT            |          |          |          |
| rs535411 Screening Primer Rev                         | CTTTCATGGATTGTACTTTTGGTGTTGTATT |          |          |          |
